# Supplementary material for: Multi-shape active composites by 3D printing of digital shape memory polymers
Source: PubMed Central journal article supplement (PMC4829848; doi:10.1038/srep24224), 2016-04-13
Supplement: srep24224-s1.pdf [file srep24224-s1.pdf]

## Supporting Information

### Multi-shape active composites by 3D printing of digital shape memory polymers

Jiangtao Wu<sup>1</sup>, Chao Yuan<sup>2</sup>, Zhen Ding<sup>3</sup>, Michael Isakov<sup>1</sup>, Yiqi Mao<sup>1</sup>, Tiejun Wang<sup>2</sup>, Martin L. Dunn<sup>3\*</sup>, H. Jerry Qi<sup>1\*</sup>

<sup>1</sup>*The George Woodruff School of Mechanical Engineering, Georgia Institute of Technology, Atlanta, GA 30332, USA*

<sup>2</sup>*State Key Laboratory for Strength and Vibration of Mechanical Structures, Department of Engineering Mechanics, Xi'an Jiaotong University, Xi'an 710049, China*

<sup>3</sup>*SUTD Digital Manufacturing and Design (DManD) Centre, Singapore University of Technology and Design, Singapore*

Table SI. The modeling parameters for three materials.

|                | Fiber 1        |          | Fiber 2        |          | Matrix         |          |
|----------------|----------------|----------|----------------|----------|----------------|----------|
| Branch         | $E_{non}$ (Pa) | $\tau_i$ | $E_{non}$ (Pa) | $\tau_i$ | $E_{non}$ (Pa) | $\tau_i$ |
| $E_1$          | 1.7E+08        | 1E-07    | 3E+08          | 0.0001   | 1.96E+08       | 8.04E-06 |
| $E_2$          | 1.88E+08       | 9.93E-07 | 2.75E+08       | 0.000657 | 2.02E+08       | 9.28E-05 |
| $E_3$          | 2.12E+08       | 0.00001  | 2.96E+08       | 0.003872 | 2.4E+08        | 0.000827 |
| $E_4$          | 2.39E+08       | 9.08E-05 | 3.05E+08       | 0.02     | 2.7E+08        | 0.006032 |
| $E_5$          | 2.68E+08       | 0.00074  | 3.5E+08        | 0.1      | 2.92E+08       | 0.036577 |
| $E_6$          | 2.93E+08       | 0.005374 | 3.78E+08       | 0.576863 | 3.32E+08       | 0.860502 |
| $E_7$          | 3.08E+08       | 0.035368 | 2.92E+08       | 3.401616 | 3.03E+08       | 0.187428 |
| $E_8$          | 2.91E+08       | 0.2      | 2.15E+08       | 20       | 1.41E+08       | 4.728029 |
| $E_9$          | 2.85E+08       | 0.954957 | 1.47E+08       | 96.82391 | 13594410       | 83.13049 |
| $E_{10}$       | 1.38E+08       | 3.182197 | 95213467       | 362.9461 | 505667.4       | 10000    |
| $E_{11}$       | 1.62E+08       | 7.497457 | 63127650       | 1000     | 1158992        | 1848.755 |
| $E_{12}$       | 1.78E+08       | 25.11365 | 62092100       | 2671.527 | 3453594        | 375.1723 |
| $E_{13}$       | 1.53E+08       | 87.11596 | 52099306       | 7912.87  | 45511.49       | 935839.6 |
| $E_{14}$       | 1.33E+08       | 283.7953 | 42374719       | 23498.79 | 50809648       | 20       |
| $E_{15}$       | 1.22E+08       | 905.6253 | 35205449       | 71461.38 | 204851.1       | 67650.29 |
| $E_{16}$       | 1.12E+08       | 3025.975 | 27897552       | 228551.6 |                |          |
| $E_{17}$       | 98095537       | 10000    | 20760769       | 726401   |                |          |
| $E_{18}$       | 83260945       | 32677.22 | 15532429       | 2277776  |                |          |
| $E_{19}$       | 65704556       | 96510.16 | 11281878       | 7091525  |                |          |
| $E_{20}$       | 59120212       | 267333.4 | 8305791        | 21997171 |                |          |
| $E_{21}$       | 51922181       | 773277.7 | 5959708        | 68236585 |                |          |
| $E_{22}$       | 44769327       | 2339554  | 4351312        | 2.08E+08 |                |          |
| $E_{23}$       | 34599493       | 7613180  | 3329757        | 6.41E+08 |                |          |
| $E_{24}$       | 21727122       | 26070126 | 2644468        | 2.07E+09 |                |          |
| $E_{25}$       | 9995279        | 1E+08    | 2196711        | 7.07E+09 |                |          |
| $E_{26}$       | 2916758        | 5.22E+08 | 1578065        | 2.4E+10  |                |          |
| $E_{27}$       | 957137.7       | 5.77E+09 | 107012.2       | 1E+11    |                |          |
| $T_g$ (°C)     | 57             |          | 38             |          | 2              |          |
| $T_{ref}$ (°C) | 17             |          | -3             |          | -11            |          |
| $C1$           | 17.44          |          | 17.44          |          | 11.44          |          |
| $C2$           | 50.5           |          | 42.1           |          | 50.3           |          |
| $AF/k$         | -24000         |          | -23000         |          | -20000         |          |
| $E_{eq}$ (Pa)  | 7.50E+06       |          | 3.30E+06       |          | 0.6*10^6       |          |

Constitutive model and parameter characterization

To describe the thermomechanical behavior of the SMP material, the multi-branch model is used, in which one equilibrium branch and several thermoviscoelastic nonequilibrium branches are arranged in parallel. Maxwell elements are used in the nonequilibrium branches to represent the relaxation behavior of the material, and the total stress of the material can be expressed as:

$$\sigma_{total} = E_{eq}e + \sum_{m=1}^n E_{non}^m \int_0^t \frac{\partial e}{\partial s} \exp\left[-\int_s^t \frac{dt'}{\tau_m(T)}\right] ds, \quad (S1)$$

where  $E_{eq}$  is the Young's modulus of the equilibrium branch,  $E_{non}^m$  and  $\tau_m$  are the Young's modulus and temperature dependent relaxation time of the  $m$ -th nonequilibrium branch. According to the time temperature superposition principle (TTSP),  $\tau_m$  can be calculated using the relaxation time  $\tau_m^R$  at reference temperature:

$$\tau_m(T) = a^{Shift}(T)\tau_m^R, \quad (S2)$$

where  $a^{Shift}(T)$  is the temperature dependent shifting factor. According to O'Connell and McKenna, the shifting factors can be calculated by combining the Williams–Landel–Ferry (WLF) equation<sup>33</sup> and Arrhenius-type equation<sup>34</sup>. When the temperature is higher than the reference temperature, the shifting factor can be expressed using the WLF equation:

$$\log[a^{Shift}(T)] = -\frac{C_1(T - T_{ref})}{C_2 + (T - T_{ref})}, T > T_{ref}, \quad (S3)$$

where  $C_1$ ,  $C_2$  and  $T_{ref}$  are the material parameters to be characterized. If the temperature is lower than the reference temperature  $T_{ref}$ , the shifting factor can be expressed by Arrhenius-type equation:

$$\log[a^{Shift}(T)] = -\frac{AF_c}{k^{Boltz}} \left( \frac{1}{T} - \frac{1}{T_{ref}} \right), T < T_{ref}, \quad (S4)$$

where  $A$ ,  $F_c$ ,  $k^{Boltz}$  are the material constant, configurational energy and Boltzmann's constant respectively.

The DMA test results in Fig. 2 are used to identify the above parameters, including  $E_{eq}$ ,  $E_{non}^m$ ,  $\tau_m^R$ ,  $C_1$ ,  $C_2$ , and  $AF_c/k^{Boltz}$ . The storage modulus at 90 °C can be considered as the equilibrium modulus  $E_{eq}$  of each material, as the relaxation time at this temperature in each nonequilibrium branch is minimal. Employing the nonlinear regression (NLREG) method<sup>35,36</sup>,  $E_{non}^m$ ,  $\tau_m^R$ ,  $C_1$ ,  $C_2$ , and  $AF_c/k^{Boltz}$

$AF/k$  can be determined by fitting the  $\tan \delta$  and storage modulus curves shown in Fig. 2. For the multi-branch linear model, the temperature dependent storage modulus  $E_s(T)$ , loss modulus  $E_l(T)$  and loss factor  $\tan \delta(T)$  can be respectively represented as

$$E_s(T) = E_{eq} + \sum_{m=1}^n \frac{E_m^{non} \omega^2 [\tau_m(T)]^2}{1 + \omega^2 [\tau_m(T)]^2}, \quad (S5a)$$

$$E_l(T) = \sum_{m=1}^n \frac{E_m^{non} \omega \tau_m(T)}{1 + \omega^2 [\tau_m(T)]^2}, \quad (S5b)$$

$$\tan \delta(T) = \frac{E_l(T)}{E_s(T)}, \quad (S5c)$$

where  $\omega$  is the test frequency.

The determined parameters are provided in the table in the supporting information. Figure S1 shows the comparison of the DMA curves between experiment and simulation for three testing materials. Good agreement indicates that these identified parameters can describe the thermomechanical behavior of the SMP materials very well.

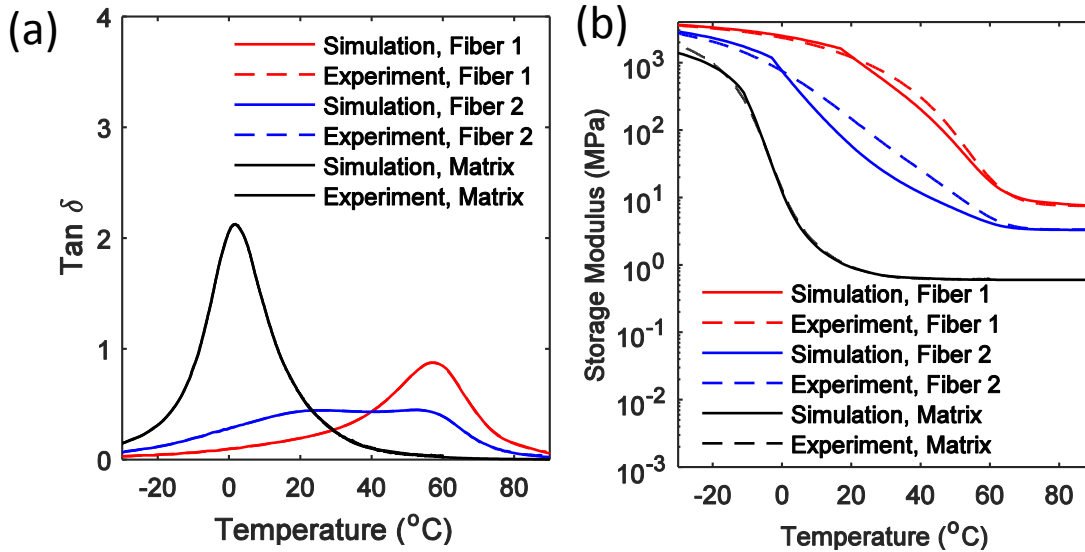

**Figure S1.** Comparison of the DMA curves between experiments and the simulation for three SMP materials.
